# Supplementary material for: Maintenance Negative Pressure Ventilation Improves Survival in COPD Patients with Exercise Desaturation
Source: PubMed Central journal article supplement (PMC6518192; doi:10.3390/jcm8040562), 2019-04-25
Supplement: jcm-08-00562-s001.pdf [file jcm-08-00562-s001.pdf]

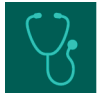

Article

# Maintenance Negative Pressure Ventilation Improves Survival in COPD Patients with Exercise Desaturation

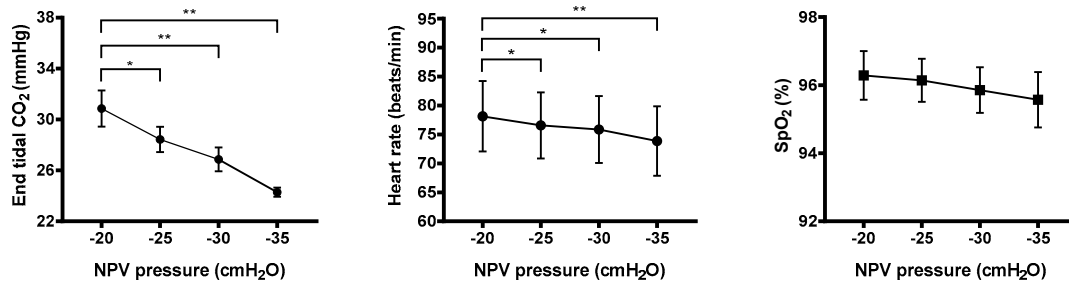

**Figure S1.** EtCO<sub>2</sub> and heart rate significantly decreased, and SpO<sub>2</sub> maintained over 90% during the NPV titration process. \* $p < 0.05$ , \*\* $p < 0.01$  was compared to the pressure level of -20 cmH<sub>2</sub>O.

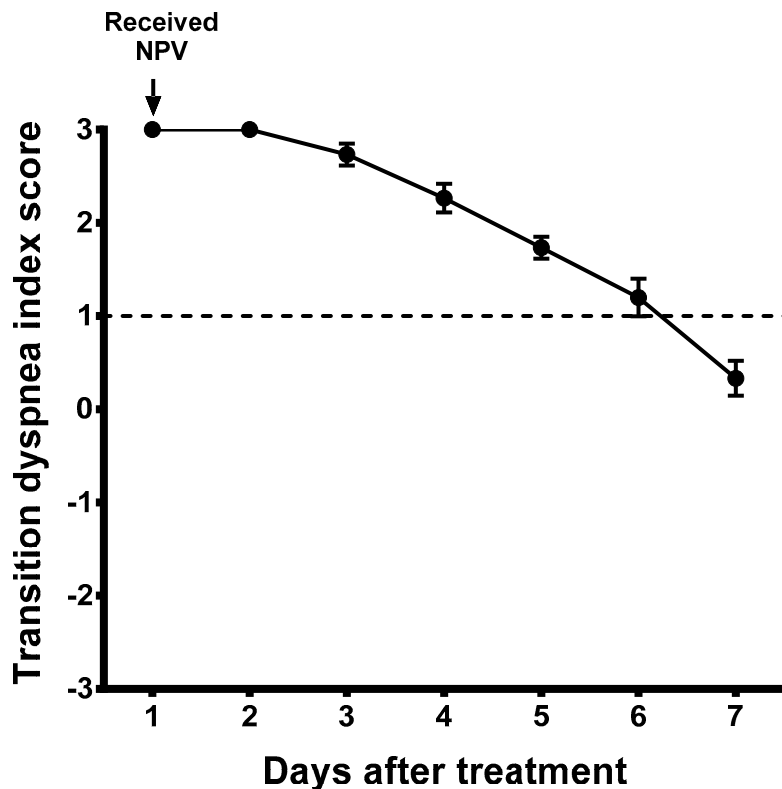

**Figure S2.** Transition dyspnea index score was evaluated by the day after patients underwent negative pressure ventilation (NPV) for 60 minutes. The response of NPV confirmed a 1-unit change in the TDI score as being clinically important.

**Table S1.** Mortality risks during 8 years in the four groups adjusted by confounders.

| Variables   | 3 year     | P value | 5 year    | p value | 8 year    | p value |
|-------------|------------|---------|-----------|---------|-----------|---------|
|             | HR(95%CI)  |         | HR(95%CI) |         | HR(95%CI) |         |
| NPV-ND      | 1          |         | 1         |         | 1         |         |
| NPV-D       | 9 (1-70)   | 0.0431  | 5 (1-12)  | 0.0014  | 3 (2-7)   | 0.0022  |
| Non-NPV-D   | 11 (1-88)  | 0.0255  | 5 (2-14)  | 0.0004  | 4 (2-9)   | 0.0002  |
| Non-NPV -ND | 6 (0.7-49) | 0.0943  | 2 (0.8-6) | 0.1149  | 3 (1-5)   | 0.0171  |

Adjusted risk compared to NPV-ND group. HR: hazard ratio. NPV: negative pressure ventilation, D: desaturation, ND: non-desaturation.

**Table S2.** Regression coefficients for the mixed-model repeated-measure models for FEV<sub>1</sub> and FEV<sub>1</sub> %.

| <b>Solution for Fixed Effects: forced expiratory volume in one second (FEV<sub>1</sub>)</b>   |              |                 |                       |           |                |                |
|-----------------------------------------------------------------------------------------------|--------------|-----------------|-----------------------|-----------|----------------|----------------|
| <b>Effect</b>                                                                                 | <b>Group</b> | <b>Estimate</b> | <b>Standard error</b> | <b>DF</b> | <b>t value</b> | <b>p value</b> |
| Intercept                                                                                     |              | 1356.200        | 6405.530              | 337       | 0.21           | 0.833          |
| time                                                                                          |              | -0.360          | 0.648                 | 336       | -0.56          | 0.579          |
| group                                                                                         | Non-NPV + D  | -404.740        | 8736.490              | 1804      | -0.05          | 0.963          |
| group                                                                                         | Non-NPV + ND | -157.610        | 8924.580              | 1804      | -0.02          | 0.986          |
| group                                                                                         | NPV + D      | -404.900        | 8976.560              | 1804      | -0.05          | 0.964          |
| group                                                                                         | NPV + ND     | 0               | .                     | .         | .              | .              |
| time*group                                                                                    | Non-NPV + D  | -1.890          | 0.741                 | 1804      | -2.55          | 0.0109         |
| time*group                                                                                    | Non-NPV + ND | -1.396          | 0.727                 | 1804      | -1.92          | 0.0549         |
| time*group                                                                                    | NPV + D      | -0.137          | 0.738                 | 1804      | -0.19          | 0.8529         |
| time*group                                                                                    | NPV + ND     | 0               | .                     | .         | .              | .              |
| time*time                                                                                     |              | -0.013          | 0.007                 | 1804      | -1.86          | 0.0636         |
| <b>Solution for Fixed Effects: forced expiratory volume in one second (FEV<sub>1</sub> %)</b> |              |                 |                       |           |                |                |
| <b>Effect</b>                                                                                 | <b>Group</b> | <b>Estimate</b> | <b>Standard error</b> | <b>DF</b> | <b>t value</b> | <b>p value</b> |
| Intercept                                                                                     |              | 62.082          | 2.279                 | 337       | 27.24          | <.0001         |
| time                                                                                          |              | 0.132           | 0.038                 | 336       | 3.49           | 0.0006         |
| group                                                                                         | Non-NPV + D  | -18.190         | 3.113                 | 1804      | -5.84          | <.0001         |
| group                                                                                         | Non-NPV + ND | -6.624          | 3.165                 | 1804      | -2.09          | 0.0365         |
| group                                                                                         | NPV + D      | -18.688         | 3.191                 | 1804      | -5.86          | <.0001         |
| group                                                                                         | NPV + ND     | 0               | .                     | .         | .              | .              |
| time*group                                                                                    | Non-NPV + D  | -0.107          | 0.041                 | 1804      | -2.61          | 0.0091         |
| time*group                                                                                    | Non-NPV + ND | -0.124          | 0.039                 | 1804      | -3.16          | 0.0016         |
| time*group                                                                                    | NPV + D      | -0.030          | 0.040                 | 1804      | -0.74          | 0.4566         |
| time*group                                                                                    | NPV + ND     | 0               | .                     | .         | .              | .              |
| time*time                                                                                     |              | -0.002          | 0.000                 | 1804      | -5.52          | <.0001         |

NPV: negative pressure ventilation, D: desaturation, ND: non-desaturation.

**Table S3.** Regression coefficients for the mixed-model repeated-measure models for 6 minute walking distance.

| <b>Solution for fixed effects: 6 minute walking distance (meter, M)</b> |              |                 |                       |           |                |                |
|-------------------------------------------------------------------------|--------------|-----------------|-----------------------|-----------|----------------|----------------|
| <b>Effect</b>                                                           | <b>Group</b> | <b>Estimate</b> | <b>Standard error</b> | <b>DF</b> | <b>t value</b> | <b>p value</b> |
| Intercept                                                               |              | 389.300         | 10.377                | 337       | 37.51          | <.0001         |
| time                                                                    |              | 0.944           | 0.283                 | 316       | 3.33           | 0.0010         |
| group                                                                   | Non-NPV + D  | -18.213         | 14.423                | 1527      | -1.26          | 0.2069         |
| group                                                                   | Non-NPV + ND | -26.656         | 14.464                | 1527      | -1.84          | 0.0655         |
| group                                                                   | NPV + D      | -29.656         | 14.593                | 1527      | -2.03          | 0.0423         |
| group                                                                   | NPV + ND     | 0               | .                     | .         | .              | .              |
| time*group                                                              | Non-NPV + D  | -1.744          | 0.335                 | 1527      | -5.20          | <.0001         |
| time*group                                                              | Non-NPV + ND | -0.920          | 0.330                 | 1527      | -2.79          | 0.0054         |
| time*group                                                              | NPV + D      | -1.084          | 0.324                 | 1527      | -3.34          | 0.0009         |
| time*group                                                              | NPV + ND     | 0               | .                     | .         | .              | .              |
| time*time                                                               |              | -0.019          | 0.003                 | 1527      | -6.04          | <.0001         |

NPV: negative pressure ventilation, D: desaturation, ND: non-desaturation.

**Table 4.** Regression coefficients for the mixed-model repeated-measure models for Distance-saturation product (M%).

| <b>Solution for Fixed Effects: Distance-saturation product (M%)</b> |              |                 |                       |           |                |                |
|---------------------------------------------------------------------|--------------|-----------------|-----------------------|-----------|----------------|----------------|
| <b>Effect</b>                                                       | <b>Group</b> | <b>Estimate</b> | <b>Standard error</b> | <b>DF</b> | <b>t value</b> | <b>p value</b> |
| Intercept                                                           |              | 354.040         | 9.342                 | 336       | 37.90          | <.0001         |
| time                                                                |              | 0.411           | 0.249                 | 316       | 1.65           | 0.0998         |
| group                                                               | Non-NPV + D  | -48.799         | 13.014                | 1527      | -3.75          | 0.0002         |
| group                                                               | Non-NPV + ND | -25.514         | 13.019                | 1527      | -1.96          | 0.0502         |
| group                                                               | NPV + D      | -62.926         | 13.135                | 1527      | -4.79          | <.0001         |
| group                                                               | NPV + ND     | 0               | .                     | .         | .              | .              |
| time*group                                                          | Non-NPV + D  | -1.222          | 0.291                 | 1527      | -4.20          | <.0001         |
| time*group                                                          | Non-NPV + ND | -0.773          | 0.284                 | 1527      | -2.72          | 0.0066         |
| time*group                                                          | NPV + D      | -0.606          | 0.281                 | 1527      | -2.16          | 0.0308         |
| time*group                                                          | NPV + ND     | 0               | .                     | .         | .              | .              |
| time*time                                                           |              | -0.01391        | 0.002758              | 1527      | -5.04          | <.0001         |

NPV: negative pressure ventilation, D: desaturation, ND: non-desaturation.
